# Supplementary material for: Conformational dynamism for DNA interaction in the Salmonella RcsB response regulator
Source: PubMed Central journal article supplement — Nucleic Acids Res. 2017 Nov 23;46(1):456–72. doi: 10.1093/nar/gkx1164 (PMC5758874; doi:10.1093/nar/gkx1164), 2017-11-23
Supplement: gkx1164_supp.pdf [file gkx1164_supp.pdf]

**Conformational dynamism for DNA interaction in *Salmonella typhimurium* RcsB response regulator**

Patricia Casino, Laura Miguel-Romero, Juanjo Huesa, Pablo García, Francisco García-del Portillo and Alberto Marina.

Table of Contents:

Tables supplement 1-7

Figures supplement 1-16

**Table S1. Primer list used in the manuscript**

|                           | <b>Primers (5'→3')</b>                                                                      |
|---------------------------|---------------------------------------------------------------------------------------------|
| Wild-type cloning         | FW: CAGGGACCCGGTATGAACAATATGAACGTAATTATTGCC<br>RW: CGAGGAGAAGCCCGGTTACAGGGTGACGGAAGAGAGATAG |
| K180A                     | CCGCAGCATTgcgACCATCAGCAG<br>TTGAGCTTCTTGCGGATTC                                             |
| Q185A                     | CATCAGCAGCgcaAAGAAATCGGC<br>GTCTTAATGCTGCGGTTG                                              |
| K187A                     | CAGCCAGAAGgcaTCGGCGATGATG<br>CTGATGGTCTTAATGCTGC                                            |
| K154A                     | TCTGTCGCCAgcaGAGAGCGAAG<br>CGCTTATCGCCGTAACCG                                               |
| L202D                     | TATCGCGCTGgacAACTATCTCTC<br>TCATTCTCTACGCCCAGTTTC                                           |
| L202F                     | TATCGCGCTGttcAACTATCTCTC<br>TCATTCTCTACGCCCAGTTTC                                           |
| R160A                     | CGAAGTATTAgccCTGTTGCGCGAG<br>CTCTCTTTTGCGGACAGAC                                            |
| R160D                     | CGAAGTATTAgacCTGTTGCGCGAG<br>CTCTCTTTTGCGGACAGAC                                            |
| A93D                      | CAACAACCCGgacATCCTGAGCG<br>TTCATGGTCAGAACGATAATAGAC                                         |
| R150A                     | CGGCGATAAGgctCTGTGCGCCAAAAGAGAG<br>TAACCGCCTGCGCTGATT                                       |
| D56A                      | GTTGATCACTgccCTCTCCATGC<br>ACATGCGCATCTAATTTTCG                                             |
| S58A                      | CACTGACCTCgccATGCCGGGAG<br>ATCAACACATGCGCATCTAATTTTCGG                                      |
| H12A                      | TGCCGATGACgccCCGATTGTAC<br>ATAATTACGTTTCATATTGTTTCATC                                       |
| M88A                      | CGTTCTGACCgccAACAAACAATCCG<br>ATAATAGACAGGCTCGGAAAATG                                       |
| E170A                     | CCTGGTCACCgccATCGCCAAGAAG<br>AAGCCCTCGGCGAACAGG                                             |
| S207C                     | CTATCTCTTgcgGTCACCCTGA<br>TTGAGCAGCGGATATCATT                                               |
| <i>rcsA</i>               | FW: CCTGTTTTACTAAGGTTTATCCGAAAATA<br>RW: TATTTTCGGATAAACCTTAGTAAAACAGG                      |
| <i>P1<sub>f1hDC</sub></i> | FW: CGTCGAATTAGGAAAAATCTTAGGCA<br>RW: TGCCTAAGATTTTTCCTAATTCGACG                            |
| KO- <i>rcsB</i> -Fw       | GCCCAATACATGAACAATATGAACGTAATTATTGCCGATGTGTAGGCTGGAGCTGCTTC                                 |
| KO- <i>rcsB</i> -Rv       | TAAGCGTAGCGCCATCAGGCTGGGTAAACATAAAAAGCGATATTCCGGGGATCCGTCGACC                               |

**Table S2. Interdomain interactions for RcsB<sub>BeF</sub>**

| Subunit A Structural element | Residue  | Atom type | Subunit B Structural element | Residue  | Atom type | Distance |
|------------------------------|----------|-----------|------------------------------|----------|-----------|----------|
| Lβ <sub>α</sub> 1            | 12(HIS)  | CE1[ C ]  | Lβ <sub>α</sub> 4            | 88(MET)  | CB [ C ]  | 3.77     |
| Lβ <sub>α</sub> 1            | 12(HIS)  | CD2[ C ]  | Lβ <sub>α</sub> 5            | 109(LYS) | C [ C ]   | 3.62     |
| Lβ <sub>α</sub> 1            | 12(HIS)  | CD2[ C ]  | Lβ <sub>α</sub> 5            | 110(GLN) | CA [ C ]  | 3.90     |
| α <sub>1</sub>               | 13(PRO)  | CB [ C ]  | Lβ <sub>α</sub> 5            | 113(PRO) | CB [ C ]  | 3.83     |
| α <sub>1</sub>               | 14(ILE)  | CD1[ C ]  | α <sub>1</sub>               | 18(GLY)  | C [ C ]   | 3.43     |
| α <sub>1</sub>               | 14(ILE)  | CD1[ C ]  | α <sub>1</sub>               | 19(ILE)  | CA [ C ]  | 3.74     |
| α <sub>1</sub>               | 17(PHE)  | CE2[ C ]  | loop5                        | 113(PRO) | CB [ C ]  | 3.78     |
| α <sub>1</sub>               | 18(GLY)  | C [ C ]   | α <sub>1</sub>               | 14(ILE)  | CD1[ C ]  | 3.55     |
| α <sub>1</sub>               | 18(GLY)  | CA [ C ]  | α <sub>1</sub>               | 18(GLY)  | CA [ C ]  | 3.49     |
| α <sub>1</sub>               | 19(ILE)  | CA [ C ]  | α <sub>1</sub>               | 14(ILE)  | CD1[ C ]  | 3.97     |
| α <sub>1</sub>               | 21(LYS)  | CG [ C ]  | α <sub>1</sub>               | 17(PHE)  | CD2[ C ]  | 3.57     |
| Lβ <sub>α</sub> 4            | 88(MET)  | SD [ S ]  | Lβ <sub>α</sub> 4            | 88(MET)  | SD [ S ]  | 3.33     |
| Lβ <sub>α</sub> 4            | 88(MET)  | CB [ C ]  | Lβ <sub>α</sub> 1            | 12(HIS)  | CE1[ C ]  | 3.78     |
| Lβ <sub>α</sub> 5            | 109(LYS) | C [ C ]   | Lβ <sub>α</sub> 1            | 12(HIS)  | CD2[ C ]  | 3.66     |
| Lβ <sub>α</sub> 5            | 110(GLN) | CG [ C ]  | Lβ <sub>α</sub> 1            | 12(HIS)  | CD2[ C ]  | 3.93     |
| Lβ <sub>α</sub> 5            | 113(PRO) | CB [ C ]  | α <sub>1</sub>               | 17(PHE)  | CE1[ C ]  | 3.57     |
| Lα <sub>7α</sub> 8           | 165(GLY) | CA [ C ]  | α <sub>10</sub>              | 199(ILE) | CD1[ C ]  | 3.49     |
| Lα <sub>9α</sub> 10          | 197(ASN) | CB [ C ]  | Lα <sub>7α</sub> 8           | 167(LEU) | CD1[ C ]  | 3.76     |
| α <sub>10</sub>              | 199(ILE) | CD1[ C ]  | α <sub>7</sub>               | 162(PHE) | CE2[ C ]  | 3.40     |
| α <sub>10</sub>              | 199(ILE) | CB [ C ]  | Lα <sub>7α</sub> 8           | 167(LEU) | CD2[ C ]  | 3.78     |
| α <sub>10</sub>              | 199(ILE) | CG1[ C ]  | α <sub>10</sub>              | 198(ASP) | CB [ C ]  | 3.81     |
| α <sub>10</sub>              | 200(ALA) | N [ N ]   | Lα <sub>7α</sub> 8           | 167(LEU) | CD2[ C ]  | 3.71     |
| α <sub>10</sub>              | 202(LEU) | CB [ C ]  | α <sub>10</sub>              | 202(LEU) | CD2[ C ]  | 3.82     |
| α <sub>10</sub>              | 203(ASN) | ND2[ N ]  | Lα <sub>7α</sub> 8           | 165(GLY) | O [ O ]   | 2.90     |

**Table S3. Structural superposition of RcsB<sub>BeF</sub> with other members of the NarL/FixJ subfamily**

| RMSD (Å)<br>(REC- alone)    | VraR <sub>BeF</sub><br>(PDB: 4IF4) | DesR <sub>BeF</sub><br>(PDB: 4LDZ) | Spr1814 <sub>BeF</sub><br>(PDB: 4ZMR) |
|-----------------------------|------------------------------------|------------------------------------|---------------------------------------|
| RcsB <sub>BeF</sub>         | 1.7 (118 residues)                 | 1.8 (118 residues)                 | 1.7 (115 residues)                    |
| RMSD (Å)<br>(DBD- alone)    |                                    |                                    |                                       |
| RcsB <sub>BeF</sub>         | 1.08 (56 residues)                 | 0.64 (43 residues)                 | 1.67 (55 residues)                    |
| RMSD (Å)<br>(REC-REC dimer) |                                    |                                    |                                       |
| RcsB <sub>BeF</sub>         | 2.5 (232 residues)                 | 2.2 (229 residues)                 | 2.2 (224 residues)                    |

**Table S4. Intradomain interactions for RcsB<sub>BeF</sub>**

| Structural element | Subunit | Residue  | Atom type | Subunit | Residue  | Atom type | Distance | Structural element    |
|--------------------|---------|----------|-----------|---------|----------|-----------|----------|-----------------------|
| $\alpha 4$         | A       | 94(ILE)  | CD1[ C ]  | A       | 156(SER) | C [ C ]   | 3.65     | $\alpha 7$            |
| $\alpha 3$         | A       | 68(ILE)  | N [ N ]   | A       | 157(GLU) | OE2[ O ]  | 3.09     | $\alpha 7$            |
| $\alpha 4$         | A       | 94(ILE)  | CD1[ C ]  | A       | 160(ARG) | CB [ C ]  | 3.67     | $\alpha 7$            |
| L $\beta\alpha 3$  | A       | 58(SER)  | OG [ O ]  | A       | 160(ARG) | NH1[ N ]  | 3.10     | $\alpha 7$            |
| L $\beta\alpha 3$  | A       | 66(ASP)  | OD1[ O ]  | A       | 160(ARG) | NH2[ N ]  | 2.81     | $\alpha 7$            |
| L $\beta\alpha 3$  | A       | 62(ASP)  | O [ O ]   | A       | 173(ALA) | O [ O ]   | 3.41     | $\alpha 8$            |
| $\alpha 4$         | A       | 92(PRO)  | CD [ C ]  | A       | 208(ALA) | C [ C ]   | 3.94     | L $\alpha 10$         |
| L $\beta\alpha 4$  | A       | 90(ASN)  | CG [ C ]  | A       | 209(THR) | CG2[ C ]  | 3.23     | L $\alpha 10$         |
| L $\beta\alpha 4$  | A       | 90(ASN)  | O [ O ]   | A       | 210(LEU) | N [ N ]   | 2.87     | L $\alpha 10$         |
| $\alpha 4$         | A       | 95(LEU)  | CD1[ C ]  | A       | 210(LEU) | CD1[ C ]  | 3.39     | L $\alpha 10$         |
|                    |         |          |           |         |          |           |          |                       |
| $\alpha 4$         | B       | 100(ASP) | OD2[ O ]  | B       | 150(ARG) | NH2[ N ]  | 3.33     | L $\alpha 6\alpha 7$  |
| $\alpha 4$         | B       | 93(ALA)  | CB [ C ]  | B       | 195(VAL) | CG1[ C ]  | 3.61     | L $\alpha 9\alpha 10$ |
| L $\beta\alpha 4$  | B       | 91(ASN)  | ND2[ N ]  | B       | 200(ALA) | O [ O ]   | 3.33     | $\alpha 10$           |
| $\alpha 4$         | B       | 94(ILE)  | CD1[ C ]  | B       | 203(ASN) | C [ C ]   | 3.82     | $\alpha 10$           |
| $\alpha 4$         | B       | 94(ILE)  | CG1[ C ]  | B       | 204(TYR) | CA [ C ]  | 3.82     | $\alpha 10$           |
| $\alpha 4$         | B       | 93(ALA)  | CB [ C ]  | B       | 204(TYR) | CD2[ C ]  | 3.67     | $\alpha 10$           |
| $\alpha 4$         | B       | 94(ILE)  | CD1[ C ]  | B       | 207(SER) | CB [ C ]  | 3.93     | $\alpha 10$           |
| L $\beta\alpha 4$  | B       | 89(ASN)  | ND2[ N ]  | B       | 207(SER) | OG [ O ]  | 3.37     | $\alpha 10$           |
| $\alpha 3$         | B       | 68(ILE)  | N [ N ]   | B       | 207(SER) | O [ O ]   | 2.85     | $\alpha 10$           |
| $\alpha 3$         | B       | 68(ILE)  | CD1[ C ]  | B       | 208(VAL) | CG1[ C ]  | 3.60     | L $\alpha 10$         |
| $\alpha 3$         | B       | 69(THR)  | OG1[ O ]  | B       | 209(THR) | OG1[ O ]  | 2.78     | L $\alpha 10$         |

**Table S5. Structural superposition of RcsB<sub>crossed</sub> dimers.**

| RMSD (Å)   | A-C                | F-D                 |
|------------|--------------------|---------------------|
| <b>A-C</b> | -                  | -                   |
| <b>F-D</b> | 1.1 (410 residues) | -                   |
| <b>G-H</b> | 1.2 (406 residues) | 0.86 (408 residues) |

**Table S6. Structural superposition of RcsB<sub>crossed</sub> individual chains.**

| RMSD (Å) | A                     | C                     | D                     | F                     | G                     |
|----------|-----------------------|-----------------------|-----------------------|-----------------------|-----------------------|
| <b>C</b> | 0.8<br>(203 residues) | -                     |                       |                       |                       |
| <b>D</b> | 0.8<br>(203 residues) | 0.7<br>(203 residues) |                       |                       |                       |
| <b>F</b> | 0.5<br>(206 residues) | 1.0<br>(204 residues) | 0.7<br>(206 residues) |                       |                       |
| <b>G</b> | 0.8<br>(203 residues) | 1.0<br>(204 residues) | 0.7<br>(206 residues) | 0.7<br>(203 residues) |                       |
| <b>H</b> | 0.8<br>(203 residues) | 1.0<br>(200 residues) | 0.8<br>(202 residues) | 0.7<br>(202 residues) | 0.7<br>(202 residues) |

**Table S7. Interdomain interactions for RcsB<sub>crossed</sub>**

| Structural Element    | Subunit | Residue  | Atom type | Subunit | Residue  | Atom type | Distance | Structural element    |
|-----------------------|---------|----------|-----------|---------|----------|-----------|----------|-----------------------|
| $\alpha 8$            | A       | 170(GLU) | CD [ C ]  | C       | 58(SER)  | CB [ C ]  | 3.64     | L $\beta 3\alpha 3$   |
| L $\alpha 7\alpha 8$  | A       | 166(PHE) | CE2[ C ]  | C       | 58(SER)  | CB [ C ]  | 3.92     | L $\beta 3\alpha 3$   |
| $\alpha 8$            | A       | 170(GLU) | OE1[ O ]  | C       | 58(SER)  | OG [ O ]  | 3.25     | L $\beta 3\alpha 3$   |
| $\alpha 8$            | A       | 170(GLU) | OE2[ O ]  | C       | 58(SER)  | OG [ O ]  | 2.70     | L $\beta 3\alpha 3$   |
| $\alpha 8$            | A       | 174(LYS) | NZ [ N ]  | C       | 62(ASP)  | OD1[ O ]  | 2.73     | L $\beta 3\alpha 3$   |
| L $\alpha 7\alpha 8$  | A       | 166(PHE) | CE1[ C ]  | C       | 66(ASP)  | CB [ C ]  | 3.65     | L $\beta 3\alpha 3$   |
| $\alpha 7$            | A       | 160(ARG) | NH1[ N ]  | C       | 66(ASP)  | OD2[ O ]  | 2.57     | L $\beta 3\alpha 3$   |
| L $\alpha 7\alpha 8$  | A       | 164(GLU) | OE2[ O ]  | C       | 66(ASP)  | O [ O ]   | 3.38     | L $\beta 3\alpha 3$   |
| L $\alpha 7\alpha 8$  | A       | 164(GLU) | O [ O ]   | C       | 68(ILE)  | N [ N ]   | 2.93     | $\alpha 3$            |
| L $\alpha 7\alpha 8$  | A       | 164(GLU) | OE2[ O ]  | C       | 69(THR)  | N [ N ]   | 3.33     | $\alpha 3$            |
| L $\alpha 7\alpha 8$  | A       | 167(LEU) | CD2[ C ]  | C       | 89(ASN)  | CG [ C ]  | 3.77     | L $\beta 4\alpha 4$   |
| L $\alpha 7\alpha 8$  | A       | 165(GLY) | O [ O ]   | C       | 89(ASN)  | ND2[ N ]  | 2.89     | L $\beta 4\alpha 4$   |
| $\alpha 10$           | A       | 202(LEU) | CD1[ C ]  | C       | 91(ASN)  | CG [ C ]  | 3.81     | L $\beta 4\alpha 4$   |
| $\alpha 10$           | A       | 202(LEU) | CD1[ C ]  | C       | 93(ALA)  | CB [ C ]  | 3.73     | L $\beta 4\alpha 4$   |
|                       |         |          |           | C       | 94(ILE)  | CD1[ C ]  | 3.84     | L $\beta 4\alpha 4$   |
| L $\alpha 7\alpha 8$  | A       | 165(GLY) | CA [ C ]  | C       | 94(ILE)  | CD1[ C ]  | 3.77     | L $\beta 4\alpha 4$   |
| $\alpha 10$           | A       | 199(ILE) | CD1[ C ]  | C       | 141(ILE) | CG2[ C ]  | 3.93     | $\alpha 6$            |
| $\alpha 10$           | A       | 203(ASN) | OD1[ O ]  | C       | 145(GLY) | O [ O ]   | 2.83     | L $\alpha 6\alpha 7$  |
| L $\beta 3\alpha 3$   | A       | 66(ASP)  | OD2[ O ]  | C       | 160(ARG) | NH2[ N ]  | 3.10     | $\alpha 7$            |
| $\alpha 3$            | A       | 69(THR)  | OG1[ O ]  | C       | 164(GLU) | OE2[ O ]  | 2.78     | L $\alpha 7\alpha 8$  |
| $\alpha 3$            | A       | 68(ILE)  | N [ N ]   | C       | 164(GLU) | O [ O ]   | 2.93     | L $\alpha 7\alpha 8$  |
| $\alpha 4$            | A       | 94(ILE)  | CD1[ C ]  | C       | 165(GLY) | CA [ C ]  | 3.82     | L $\alpha 7\alpha 8$  |
| L $\beta 4\alpha 4$   | A       | 89(ASN)  | ND2[ N ]  | C       | 165(GLY) | O [ O ]   | 2.94     | L $\alpha 7\alpha 8$  |
| $\alpha 3$            | A       | 67(GLY)  | CA [ C ]  | C       | 166(PHE) | CE1[ C ]  | 3.99     | L $\alpha 7\alpha 8$  |
| L $\beta 3\alpha 3$   | A       | 66(ASP)  | CB [ C ]  | C       | 166(PHE) | CE1[ C ]  | 3.79     | L $\alpha 7\alpha 8$  |
| L $\beta 3\alpha 3$   | A       | 58(SER)  | CA [ C ]  | C       | 166(PHE) | CZ [ C ]  | 3.76     | L $\alpha 7\alpha 8$  |
| L $\beta 3\alpha 3$   | A       | 58(SER)  | OG [ O ]  | C       | 170(GLU) | OE2[ O ]  | 3.20     | $\alpha 8$            |
| L $\beta 3\alpha 3$   | A       | 58(SER)  | O [ O ]   | C       | 173(LYS) | NZ [ N ]  | 2.96     | $\alpha 8$            |
| L $\beta 1\alpha 1$   | A       | 11(ASP)  | OD2[ O ]  | C       | 173(LYS) | NZ [ N ]  | 2.73     | $\alpha 8$            |
| L $\beta 3\alpha 3$   | A       | 66(ASP)  | CG [ C ]  | C       | 174(LYS) | CE [ C ]  | 3.84     | $\alpha 8$            |
| L $\alpha 9\alpha 10$ | A       | 196(GLU) | N [ N ]   | C       | 194(GLY) | O [ O ]   | 2.87     | L $\alpha 9\alpha 10$ |
| L $\alpha 9\alpha 10$ | A       | 194(GLY) | O [ O ]   | C       | 196(GLU) | N [ N ]   | 2.94     | L $\alpha 9\alpha 10$ |
| L $\alpha 9\alpha 10$ | A       | 196(GLU) | CD [ C ]  | C       | 196(GLU) | CB [ C ]  | 3.77     | L $\alpha 9\alpha 10$ |
| $\alpha 6$            | A       | 141(ILE) | CG2[ C ]  | C       | 199(ILE) | CD1[ C ]  | 3.80     | $\alpha 10$           |
| $\alpha 4$            | A       | 91(ASN)  | CG [ C ]  | C       | 202(LEU) | CD1[ C ]  | 3.74     | $\alpha 10$           |
| $\alpha 4$            | A       | 93(ALA)  | CB [ C ]  | C       | 202(LEU) | CD1[ C ]  | 3.79     | $\alpha 10$           |
| $\alpha 4$            | A       | 94(ILE)  | CD1[ C ]  | C       | 202(LEU) | CD2[ C ]  | 3.92     | $\alpha 10$           |
| L $\alpha 6\alpha 7$  | A       | 145(GLY) | O [ O ]   | C       | 203(ASN) | ND2[ N ]  | 2.87     | $\alpha 10$           |
| $\alpha 10$           | A       | 204(TYR) | OH [ O ]  | C       | 203(ASN) | ND2[ N ]  | 3.02     | $\alpha 10$           |
| $\alpha 10$           | A       | 203(ASN) | OD1[ O ]  | C       | 204(TYR) | OH [ O ]  | 3.03     | $\alpha 10$           |
| $\alpha 10$           | A       | 207(ALA) | CB [ C ]  | C       | 207(ALA) | CB [ C ]  | 3.69     | $\alpha 10$           |

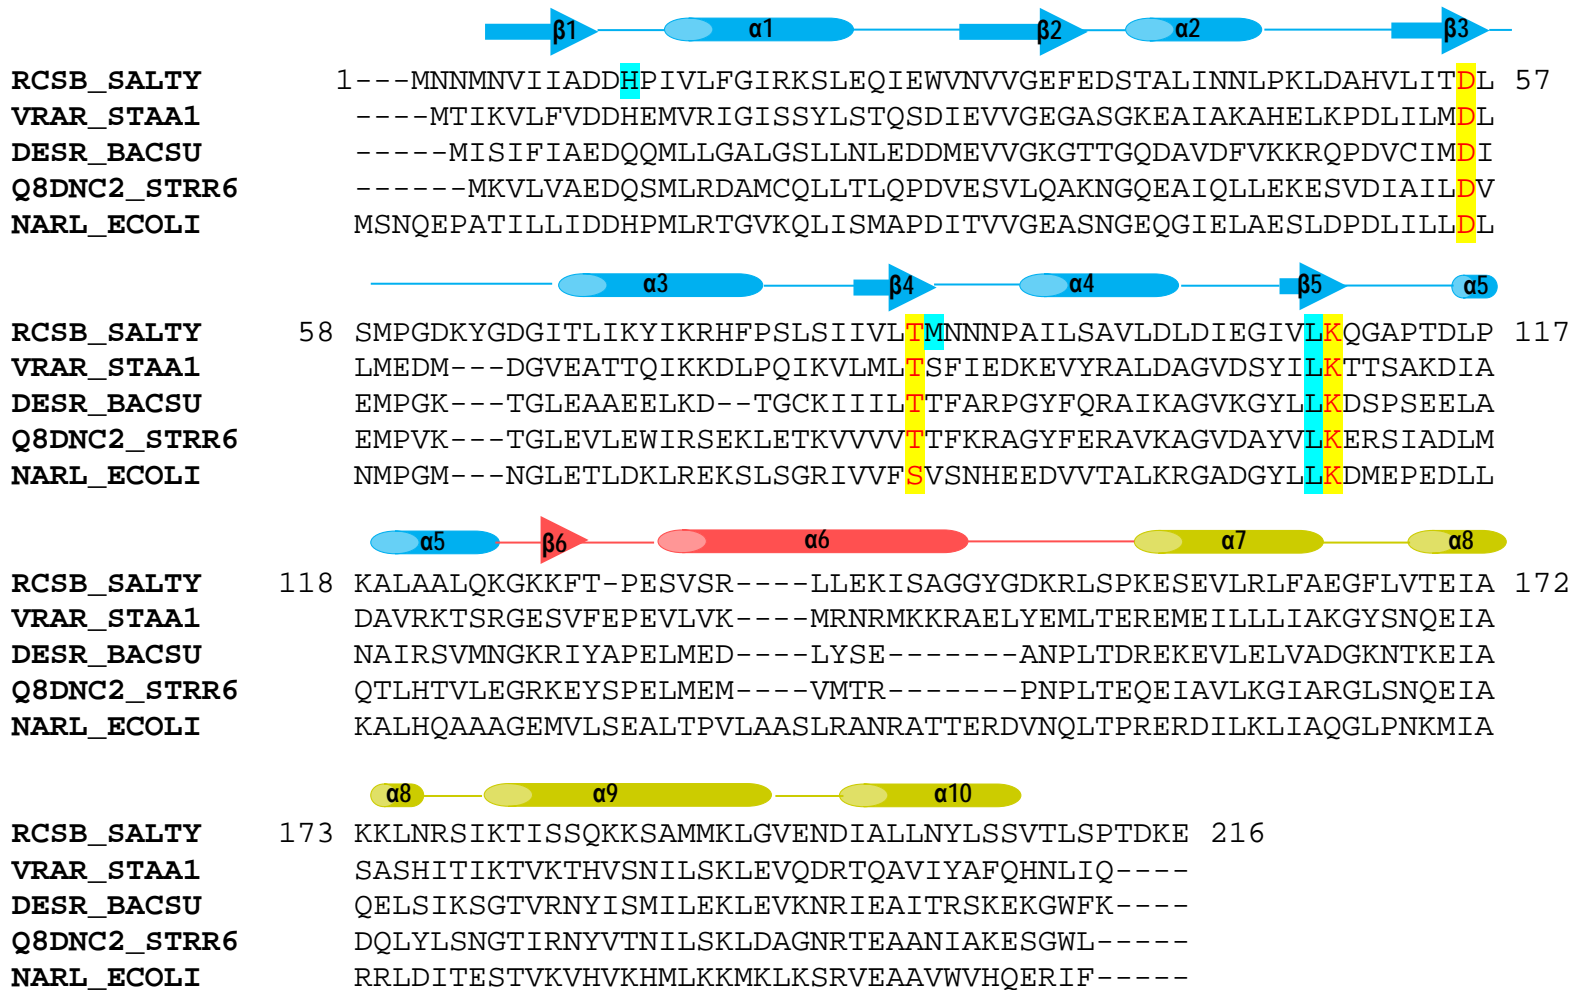

**Figure S1. Protein sequence alignment of some NarL/FixJ family RRs.** Sequence of the NarL family RRs RcsB from *S. typhimurium*, VraR from *S. aureus*, DesR from *B. subtilis*, NarL from *E. coli* and spr1814 from *S. pneumoniae*. The important catalytic residues, Asp/Thr/Lys, are highlighted in yellow and the conserved Leu involved in the  $\beta$ 5-T coupling of RcsB activation in blue. The H12 involved in dimerization and M88 working as a phosphoryl gate are also shown in blue. The secondary structure of RcsB is shown in the figure labelling the structural elements of the REC domain (in blue), the REC-DBD connector (in salmon) and the DBD domain (in yellow), color coded as in Figure 1A.

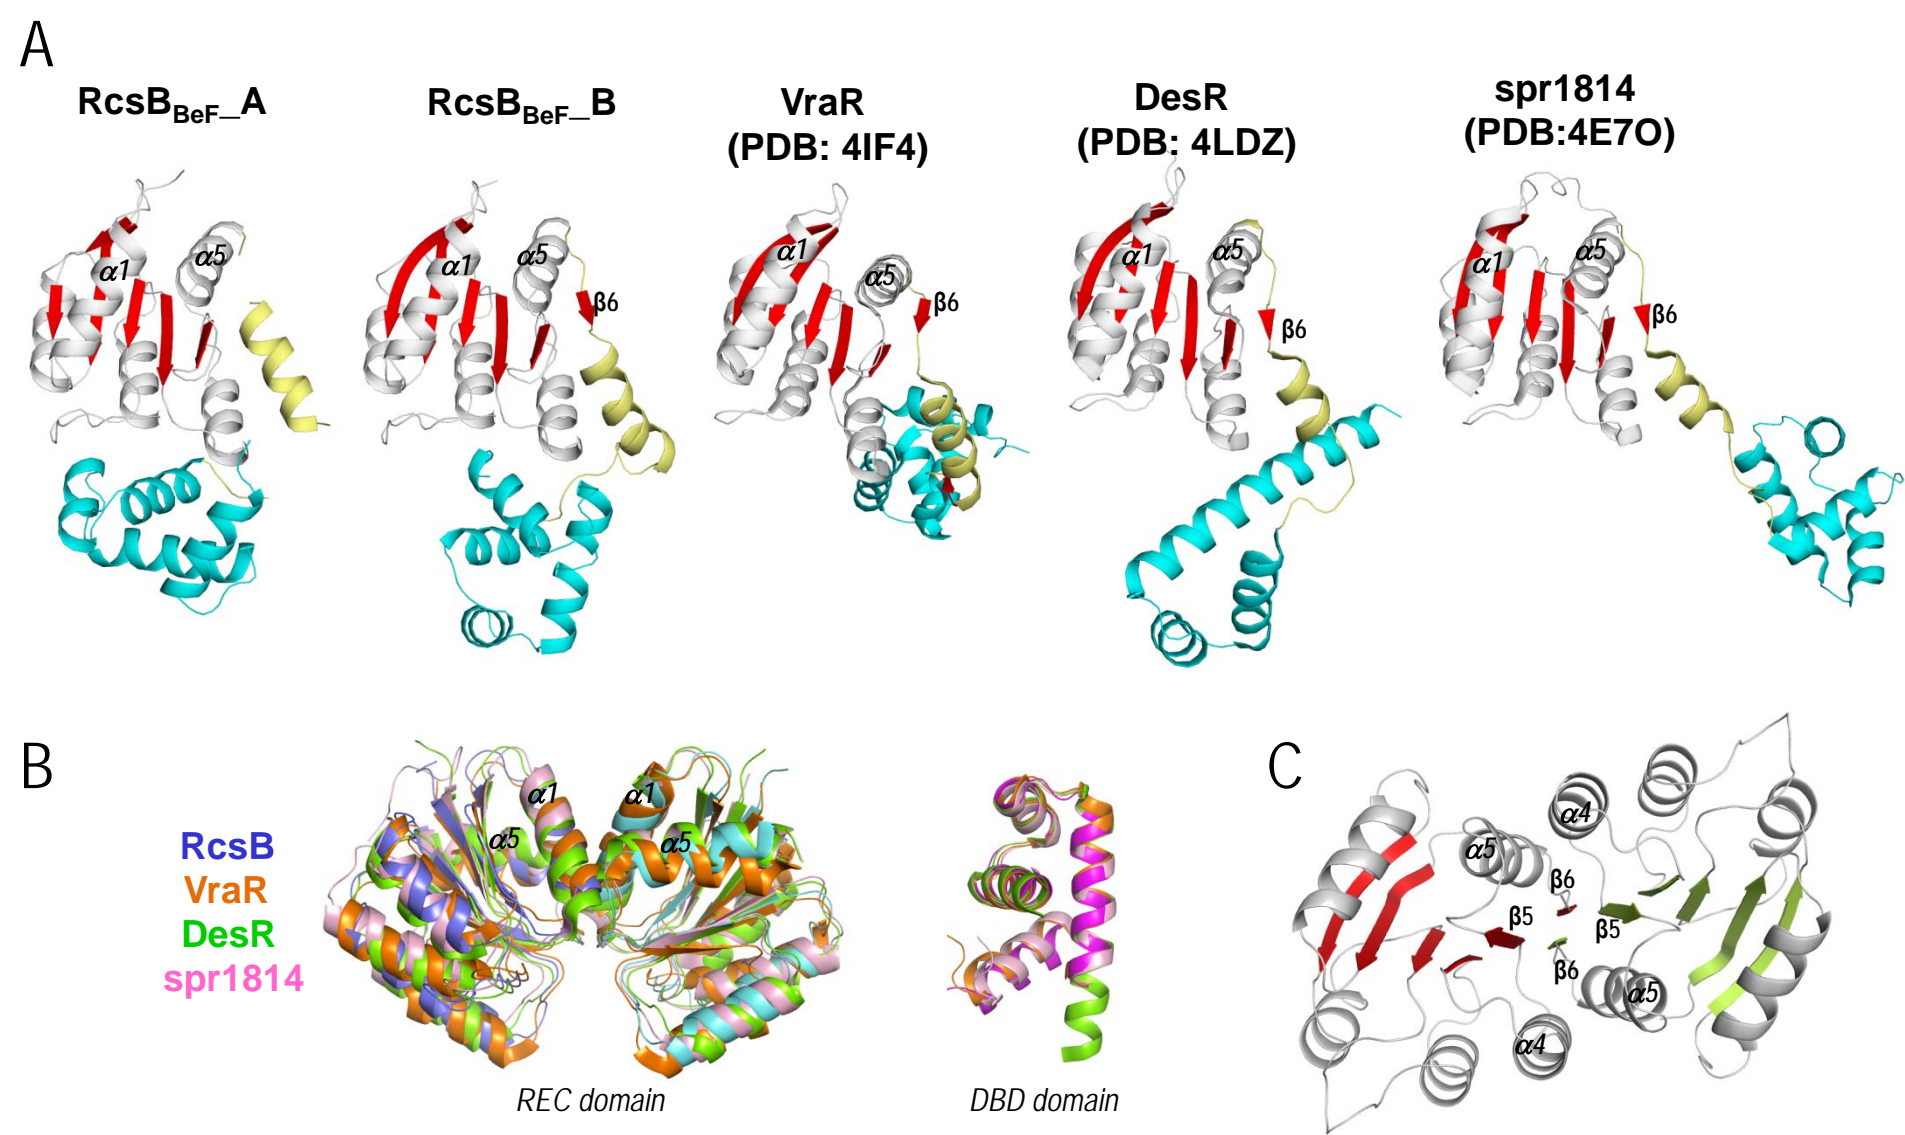

**Figure S2. Comparison of NarL/FixJ family RRs structures.** (A) Comparison of the RcsB<sub>BeF</sub> (monomer A and B), VraR, DesR and spr1814 monomers secondary structures highlighting the conserved  $\beta 6$  (in red) in the REC-DBD connector (in yellow). The DBD domain is colored in cyan and the  $\beta$  strands of the REC in red. (B) Superimposition of the RcsB<sub>BeF</sub>, VraR, DesR and spr1814 phosphorylated REC dimers and the DBD domains.  $\alpha 1$  and  $\alpha 5$  have been labeled. (C) RcsB modeled as 4-5-5 dimer using PhoB (PDB: 1ZES).  $\beta 6$  (in red and green) from each subunits is sandwiched between the dimerization surface introducing clashes.

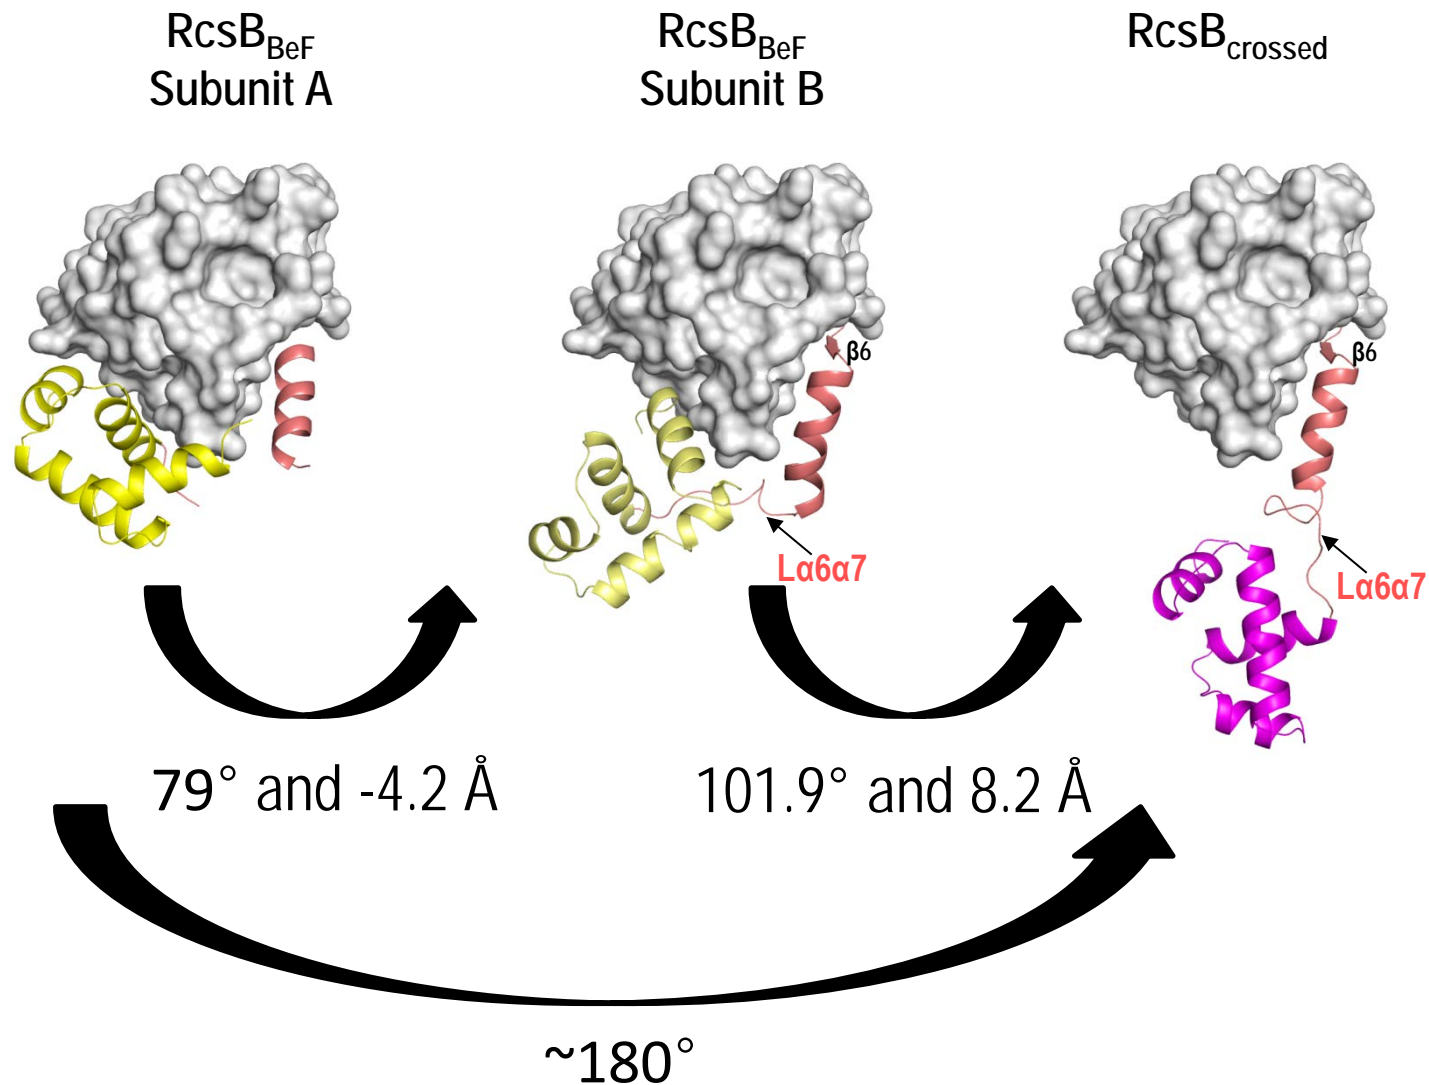

**Figure S3. Interdomain dynamism in RcsB.** The superposition of REC domains (in gray surface) shows that the DBD domain (in cartoon) moves 79° from its closed conformation, observed in subunit A (in cyan) to a more opened conformation observed in subunit B (in blue) of the asymmetric dimer. The DBD can relax even more and move an additional 100° to acquire the crossed conformation (in magenta). The REC-DBD connector (in yellow) is involved in the relaxation of the DBD.



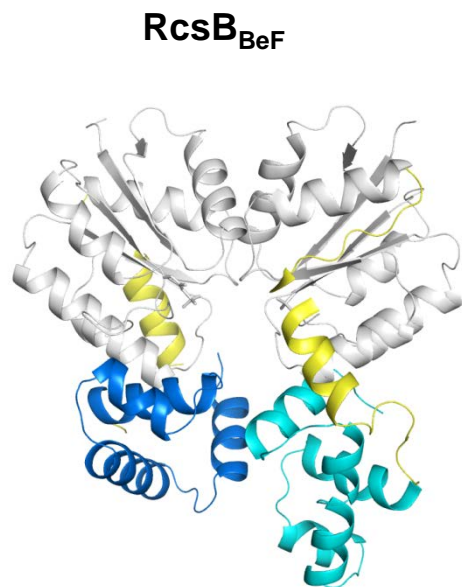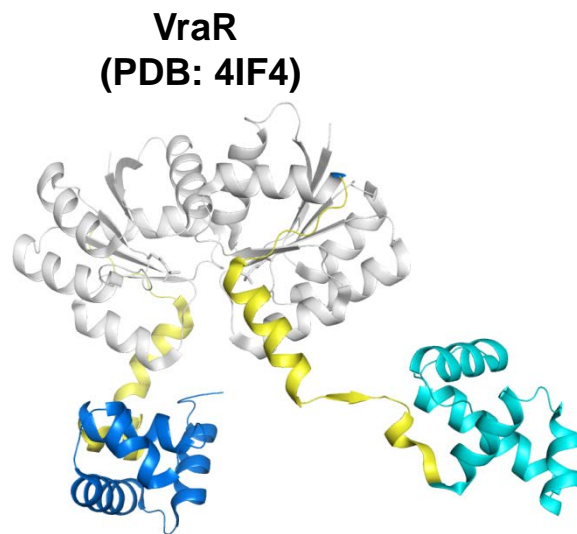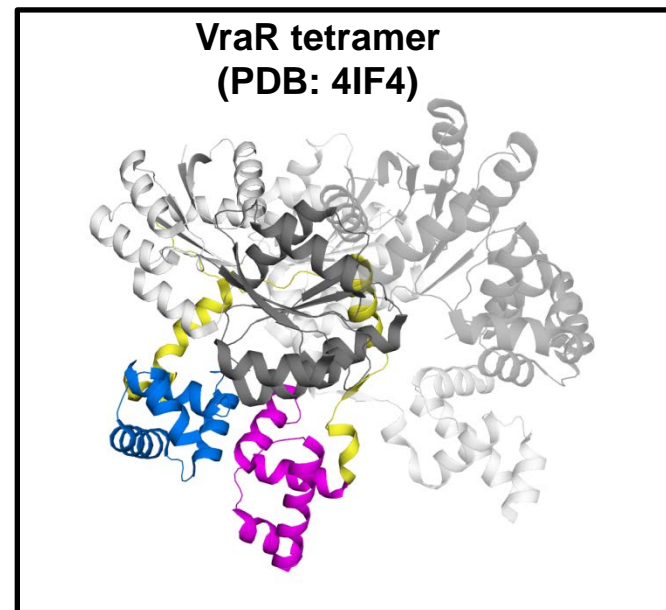

**DesR  
(PDB: 4LDZ)**

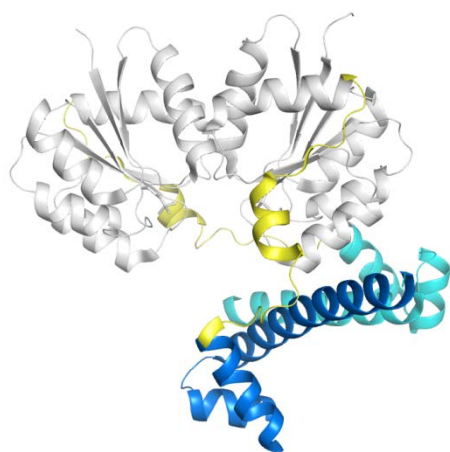

**spr1814  
(PDB:4E70)**

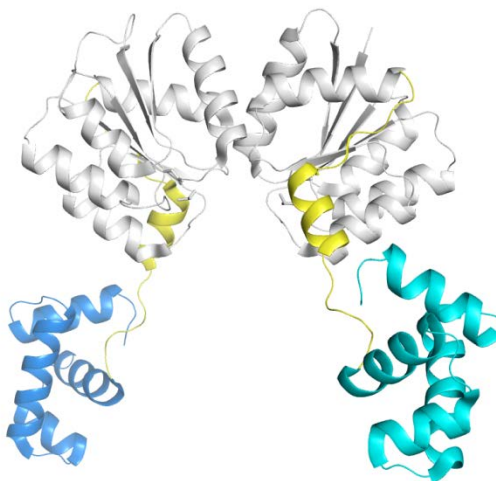

**Figure. S4. Similar dimerization at the REC produces different DBD orientations in the NarL/FixJ RRs family.** Dimerization  $\alpha 1$ - $\alpha 5$  surface in the RcsB, VraR, DesR and spr1814 NarL/FixJ RRs family. The DBD domains are in blue and the REC-DBD connector in yellow. A similar DBD dimerization as in RcsB can be obtained from the tetramer structure of VraR.

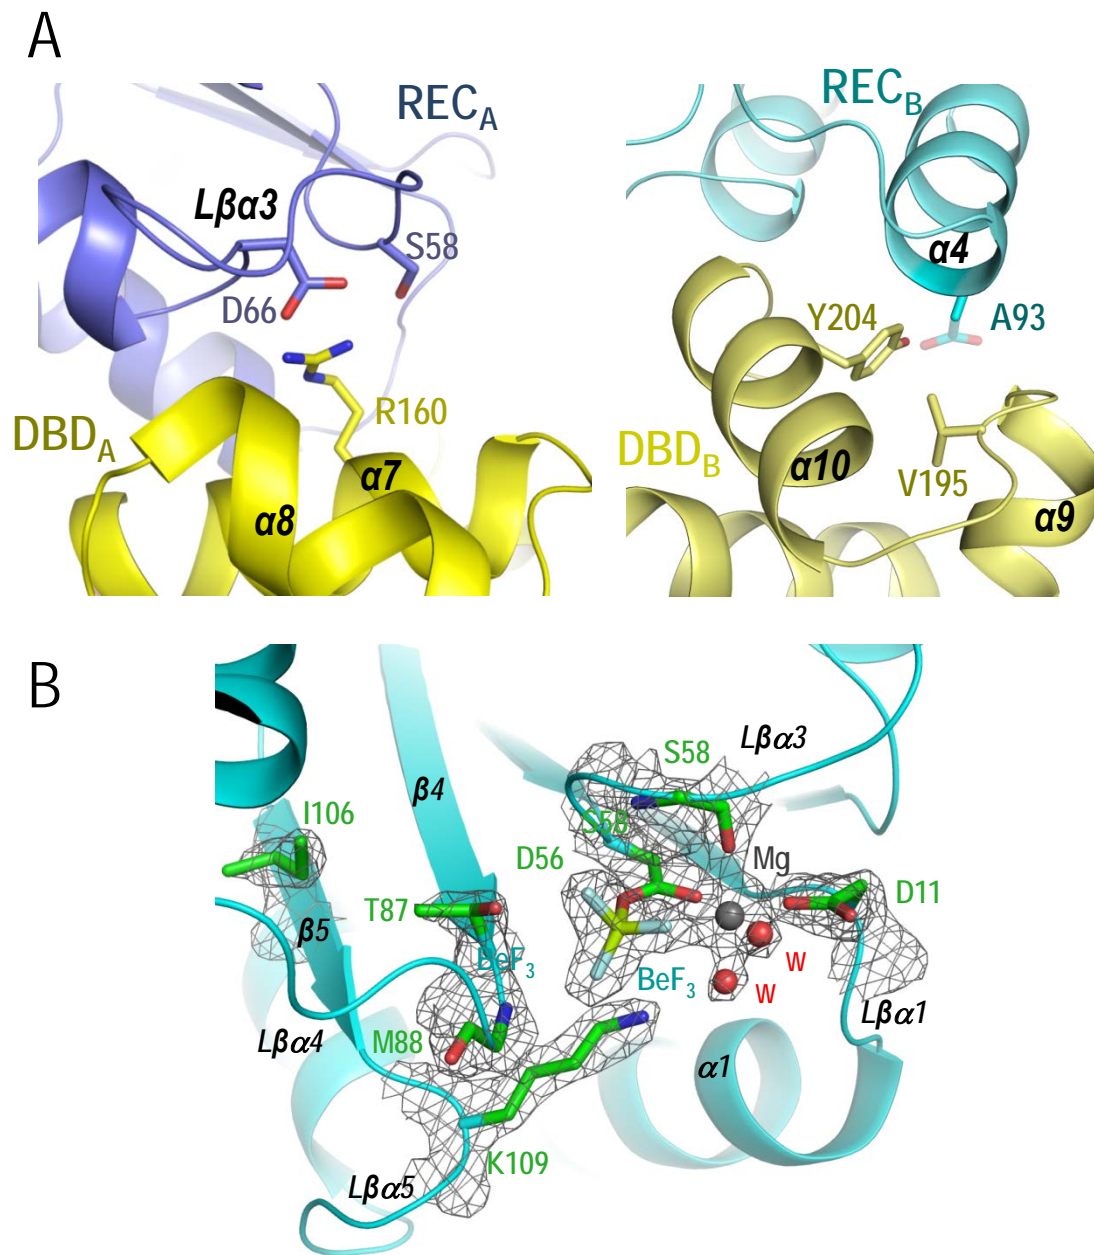

**Figure. S5. (A)** Asymmetry in  $RcsB_{BeF}$  structure. Subunit A maintains different contacts between REC-DBD (R160 in  $\alpha 7$  interacting with D66 in  $L\beta 3\alpha 3$ ) than subunit B (A93 in REC interacts with Y104 but mutation to Asp in transparency could generate clashes). **(B)** Electron density map ( $2F_o - F_c$ ) at 2.1 Å contoured at  $1\sigma$  around the catalytic residues in the active site of the  $RcsB_{BeF}$  structure.

A

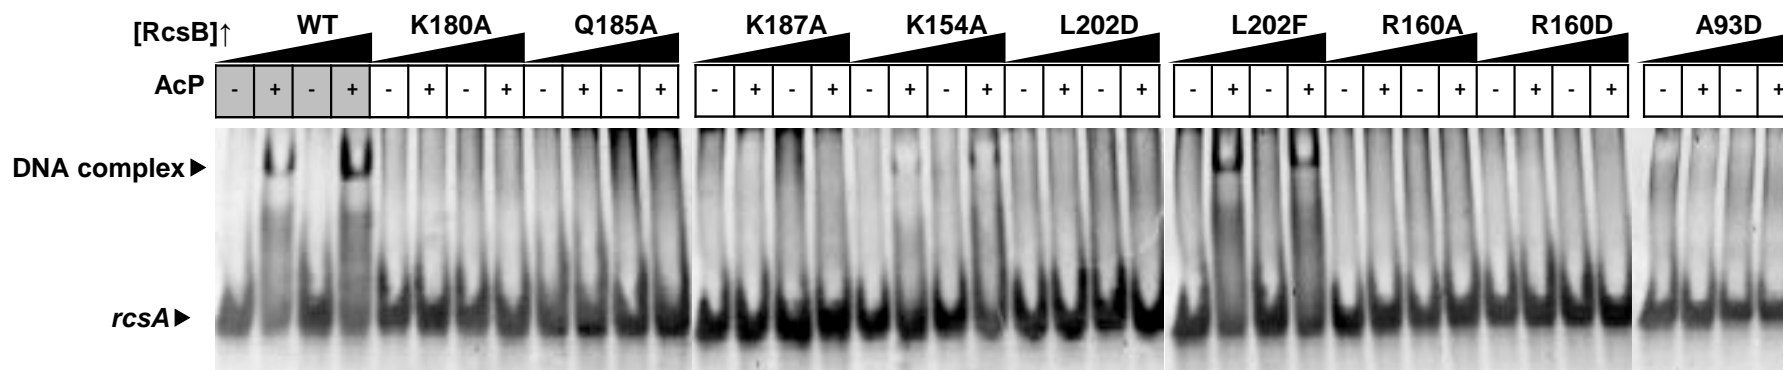

B

*rcsA*

5' - CCTGTTTTACTAAGGTTTATCCGAAAATA - 3'

TATTTTCGGATAAACCTTAGTAAACAGG

P1<sub>flhDC</sub>

5' - CGTCGAATTAGGAAAAATCTTAGGCA - 3'

TGCCTAAGATTTTTCCTAATTCGACG

C

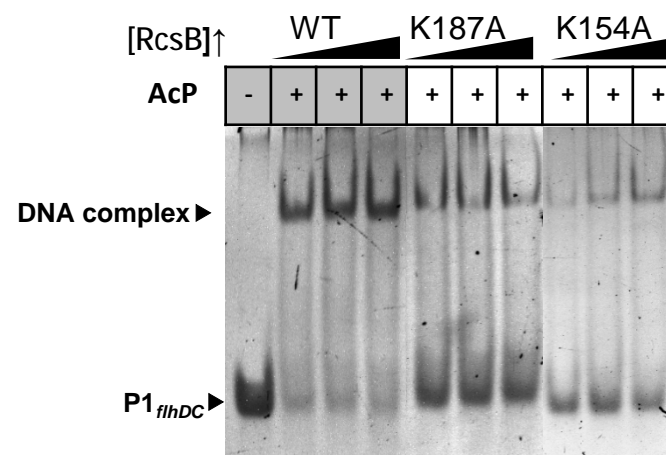

**Figure S6. EMSA experiments to test binding of RcsB mutants to DNA.** (A) Binding of RcsB to the *rcsA* promoter (-275 to -247) using two different concentrations of RcsB wild-type and mutants (20 and 50 $\mu$ M). (B) Sequence of dsDNA fragments used for EMSA experiments. (C) EMSA experiments with P1<sub>flhDC</sub> DNA and with wild-type, K187A and K154A mutants at 5, 10 and 20 $\mu$ M in presence of 50mM of AcP.

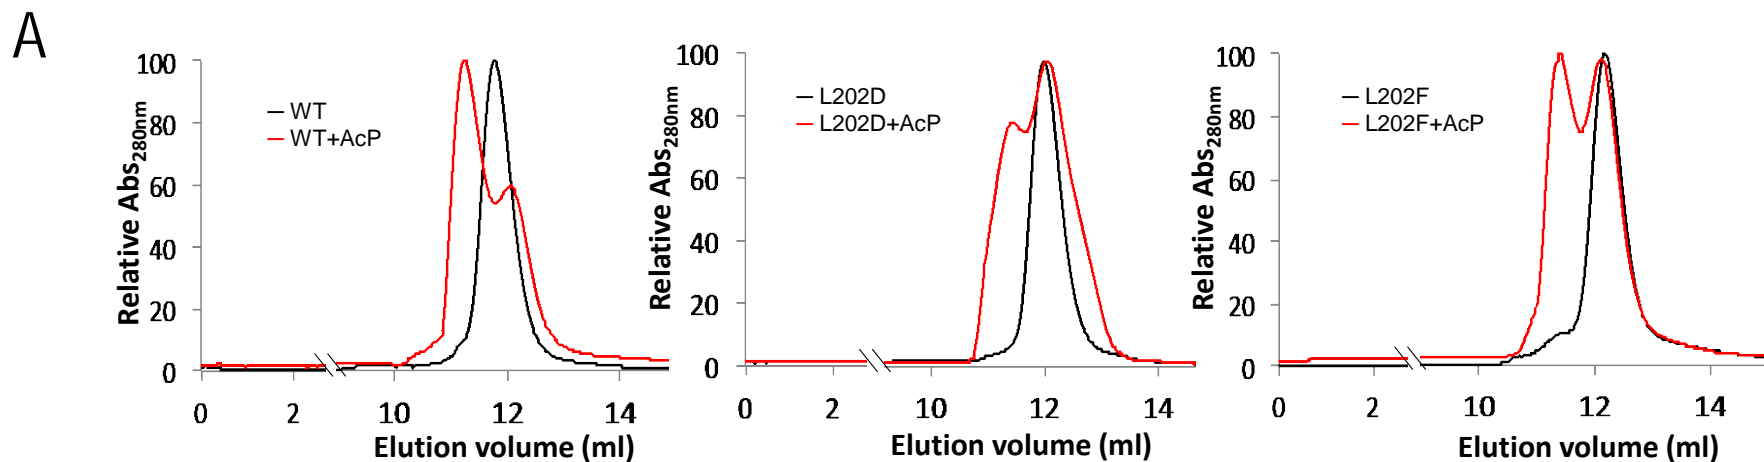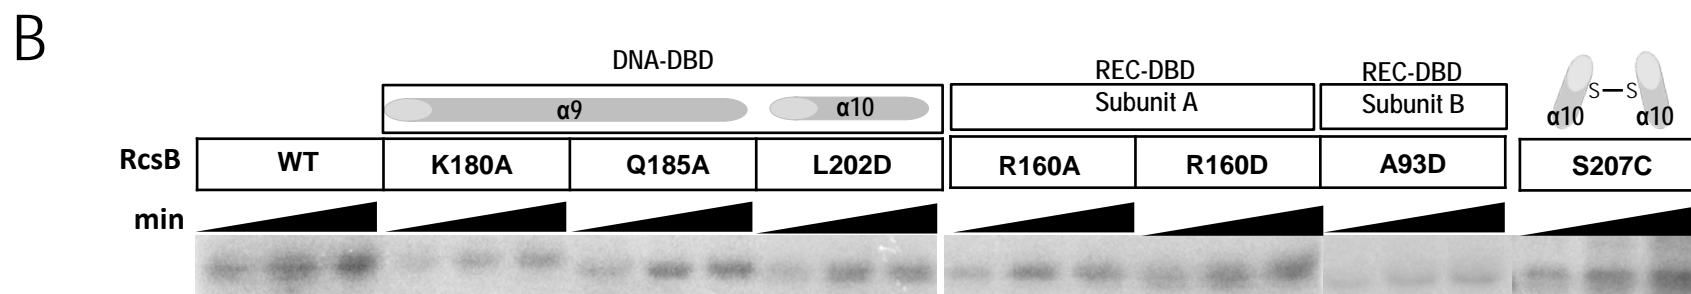

**Figure S7. Phosphorylation of RcsB mutants.** (A) Gel filtration analysis to evaluate dimer formation for mutants L202D and L202F upon phosphorylation with 50mM AcP during 30 min at 37°C and subjected to gel filtration with Superdex 75 increase 10/300. (B) The RcsB mutants in the DNA-DBD and REC-DBD surface can be phosphorylated similarly as the wild-type incubating with [<sup>32</sup>P]-acetylP for 10, 30 and 60min.

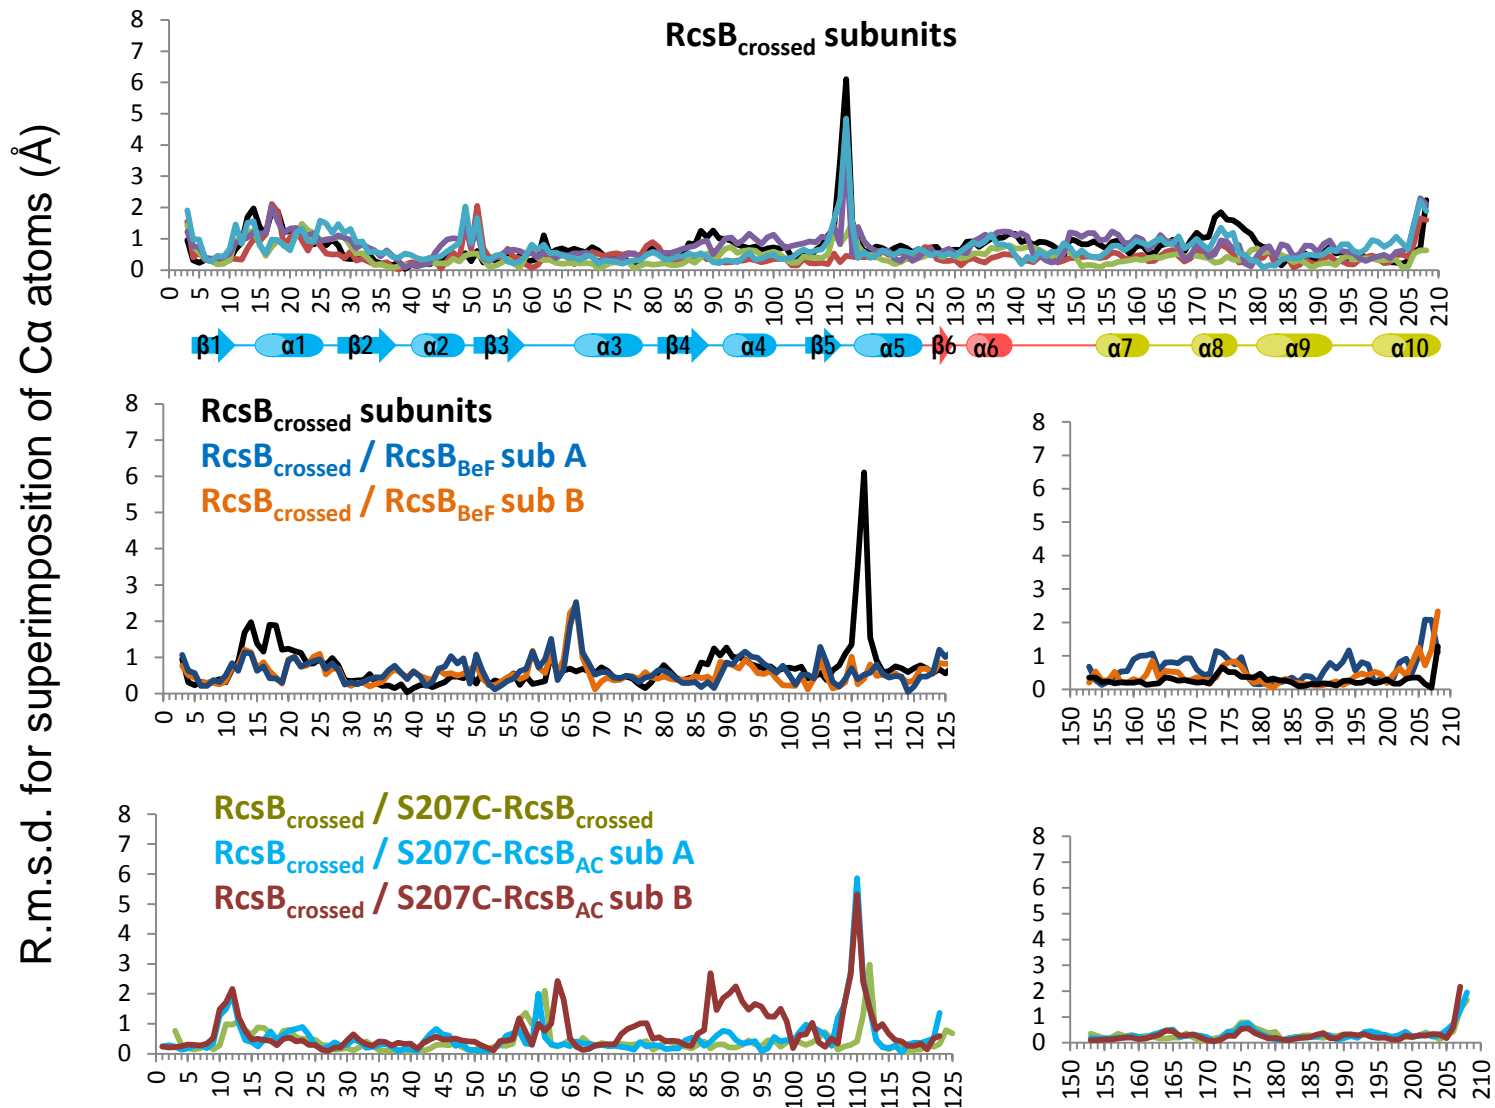

**Figure S8.** Superposition of RcsB wild-type and mutant structures showing residue number and secondary structure



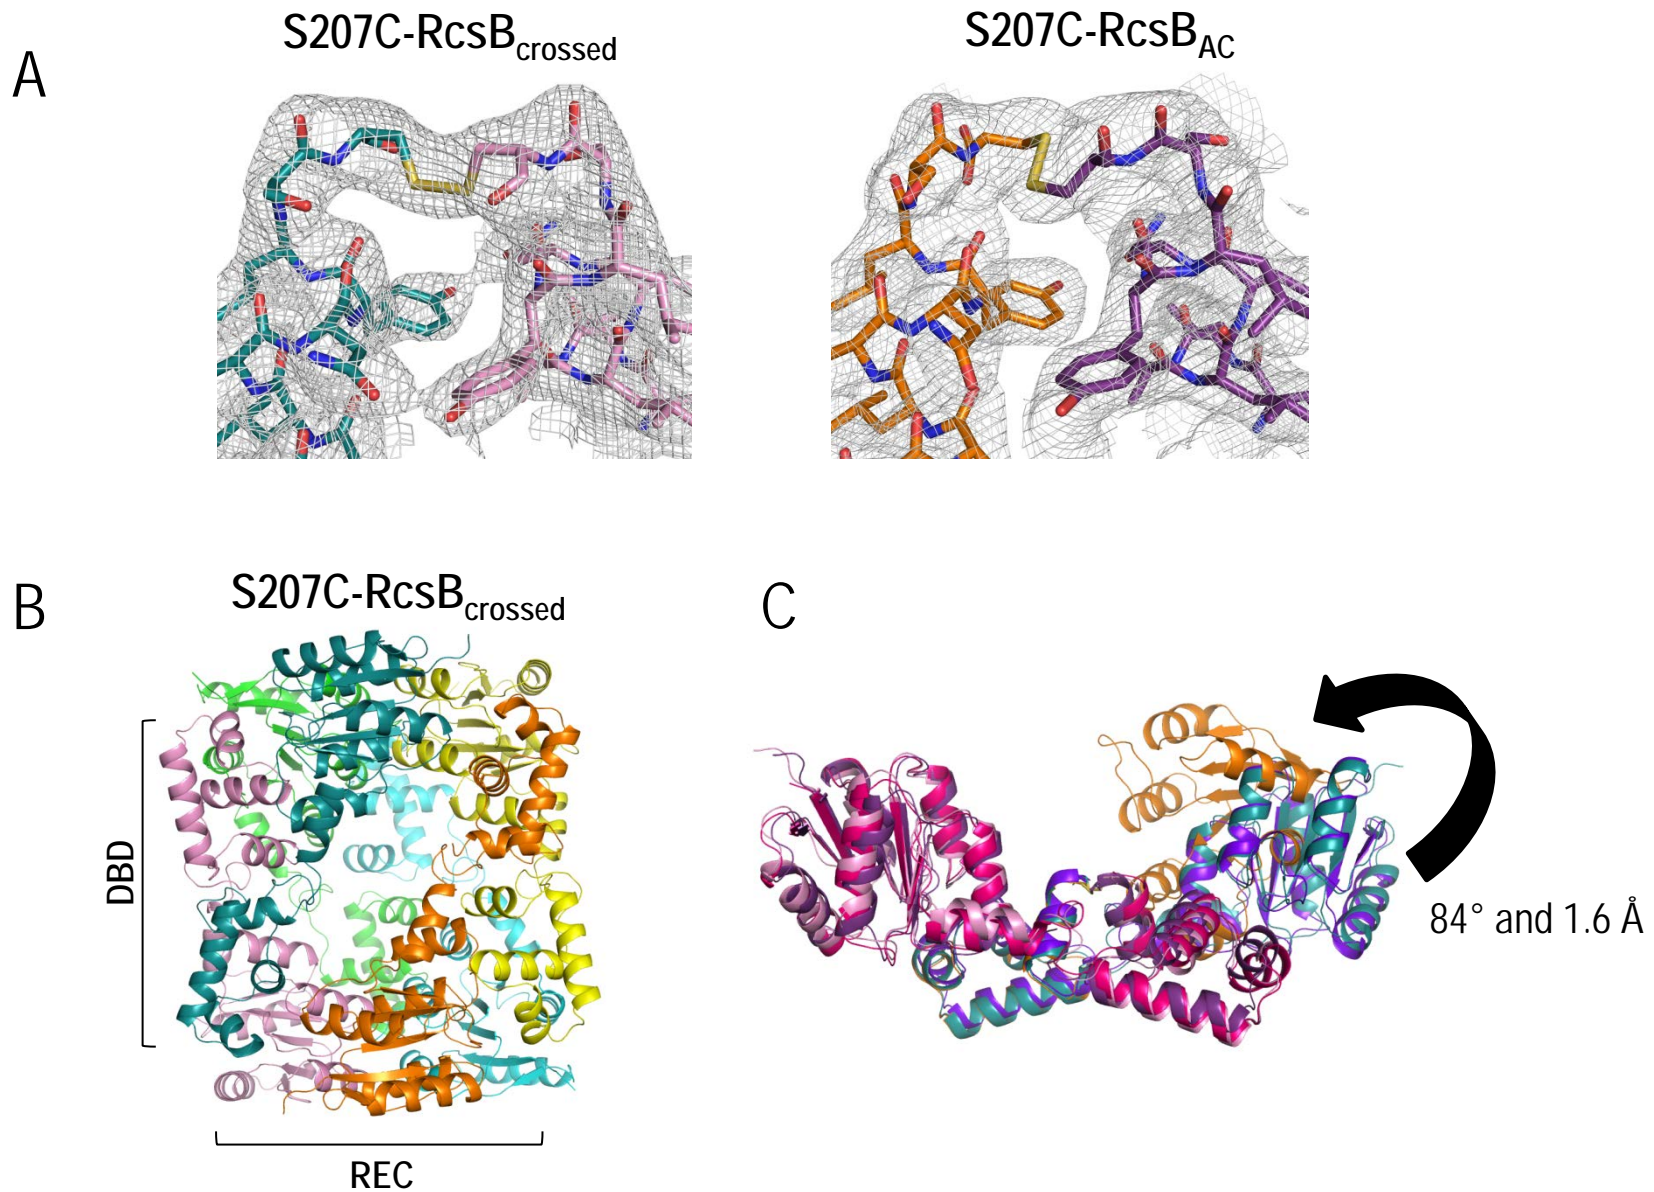

**Figure S9. Crystal structures of S207C compared to RcsB<sub>crossed</sub>.** (A) Electron density map (2Fo-Fc) at 2.6 Å for S207C-RcsB<sub>crossed</sub> and 2.5 Å for S207C-RcsB<sub>AC</sub> contoured at 1σ around helix α10 and the disulfide bond. (B) In the crystal, S207C-RcsB<sub>crossed</sub> forms the hexameric structure observed for RcsB<sub>crossed</sub>. (C) Superposition of S207C-RcsB structures with RcsB<sub>crossed</sub> demonstrates a similar conformation, however, the REC domain of subunit B in S207C-RcsB<sub>AC</sub> (in orange) has moved introducing asymmetry in the crossed conformation.

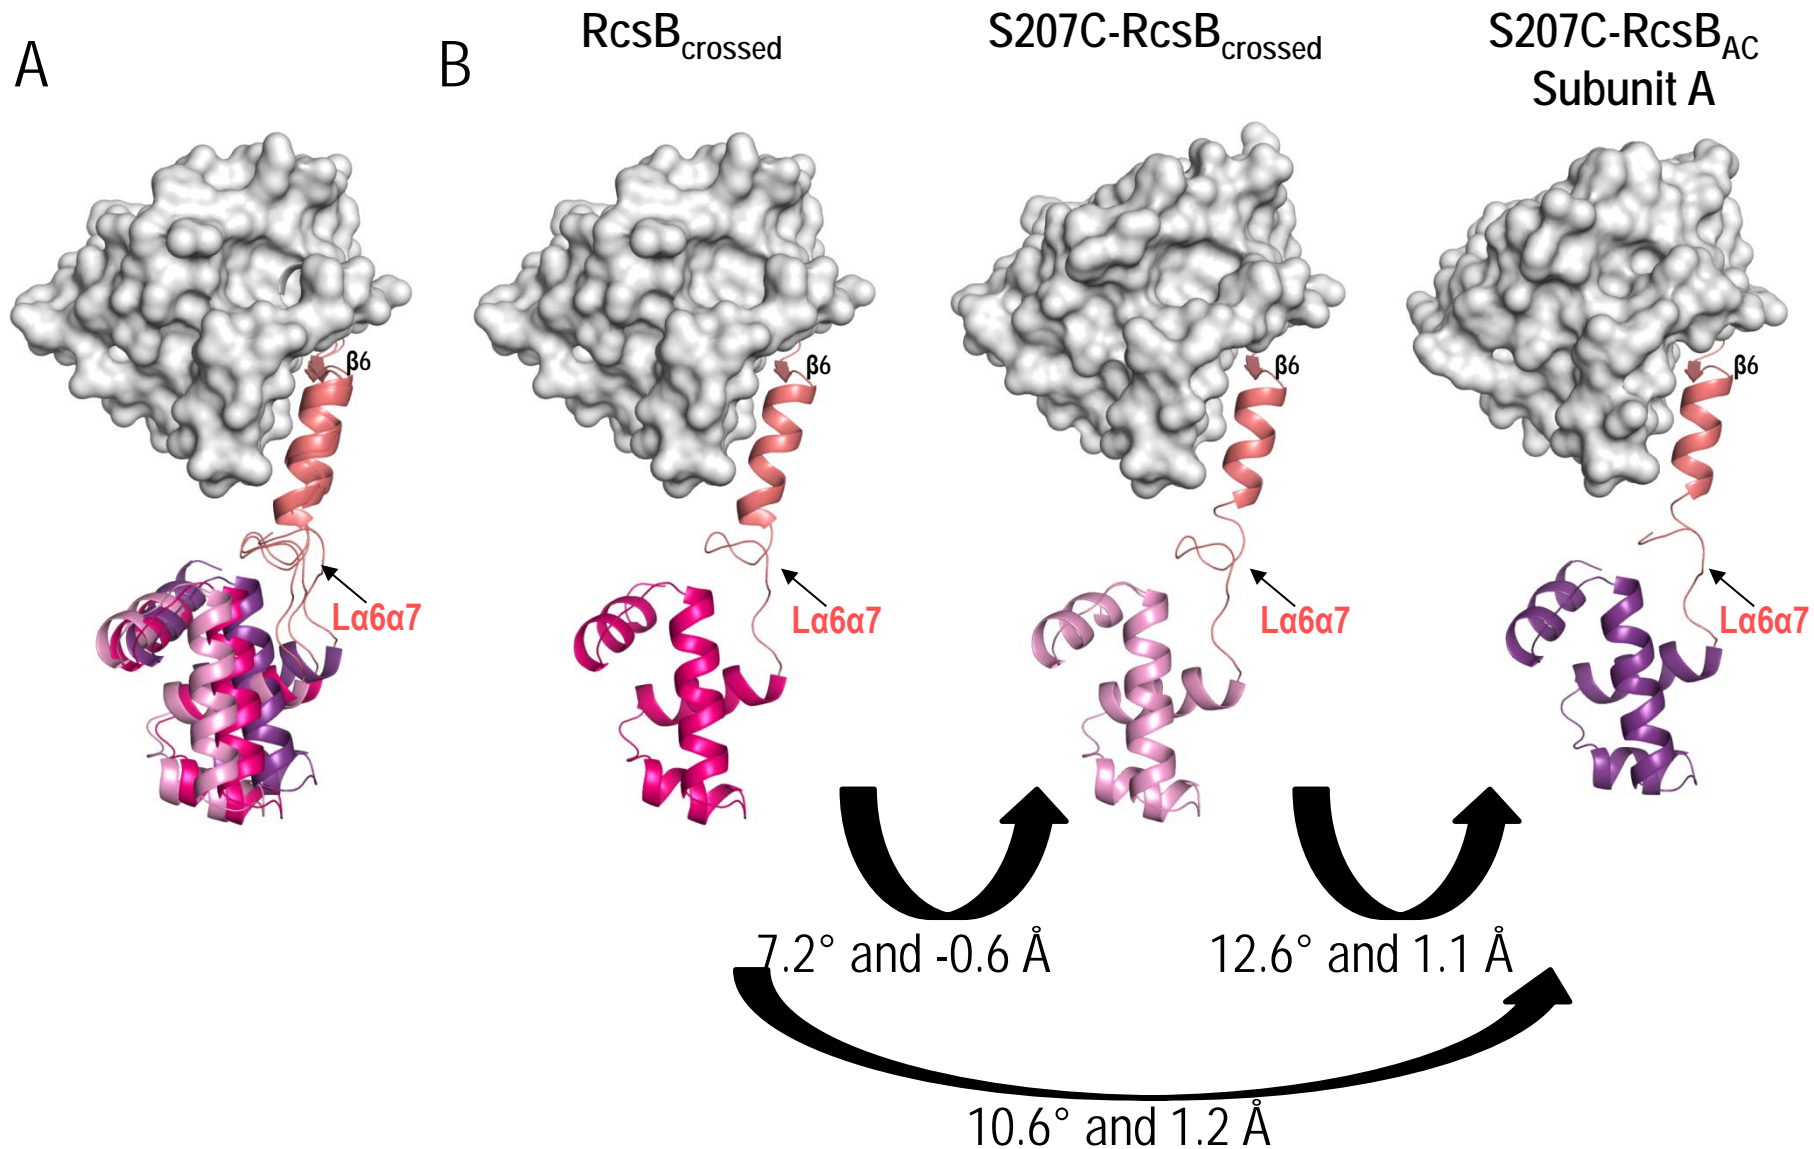

**Figure S10. Similar conformation for  $RcsB_{crossed}$ ,  $S207C-RcsB_{crossed}$  and subunit A in  $S207C-RcsB_{AC}$ .** (A) The superposition of REC domains (in gray surface) shows that DBD domain, (in darkpink for  $RcsB_{crossed}$ , pink for  $S207C-RcsB_{crossed}$  and violet for  $S207C-RcsB_{AC}$ ) present a similar orientation with reduced movements. (B) The movements among the different structures fluctuated  $\sim 10^\circ$ .

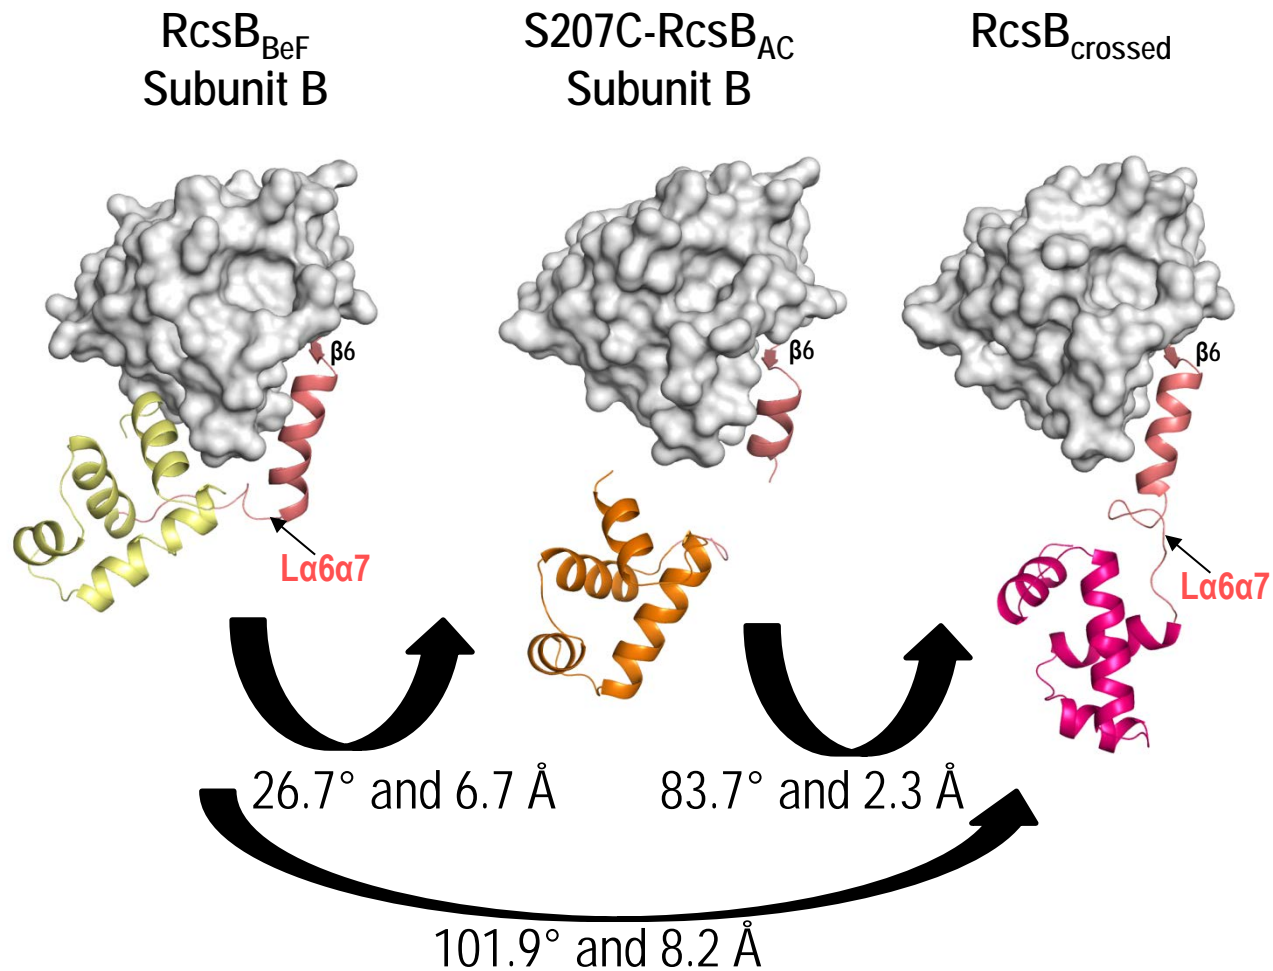

**Figure S11. Dynamism of DBD domains in RcsB.** Superposition of the REC domain shown in surface shows a similar orientation in all structures. The DBD domain, in cartoon, can swing from a close conformation, as observed in subunit B of  $RcsB_{BeF}$  (in yellow) to a more opened conformation as observed in subunit B of  $S207C-RcsB_{AC}$  (in orange) till acquires the final conformation in  $RcsB_{crossed}$  reflecting the conformational dynamism of RcsB.



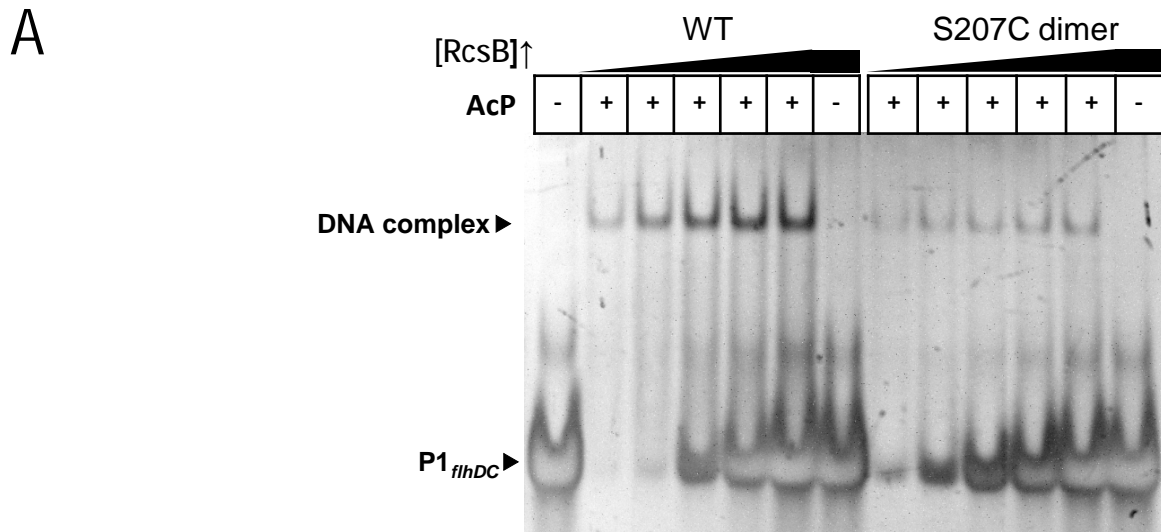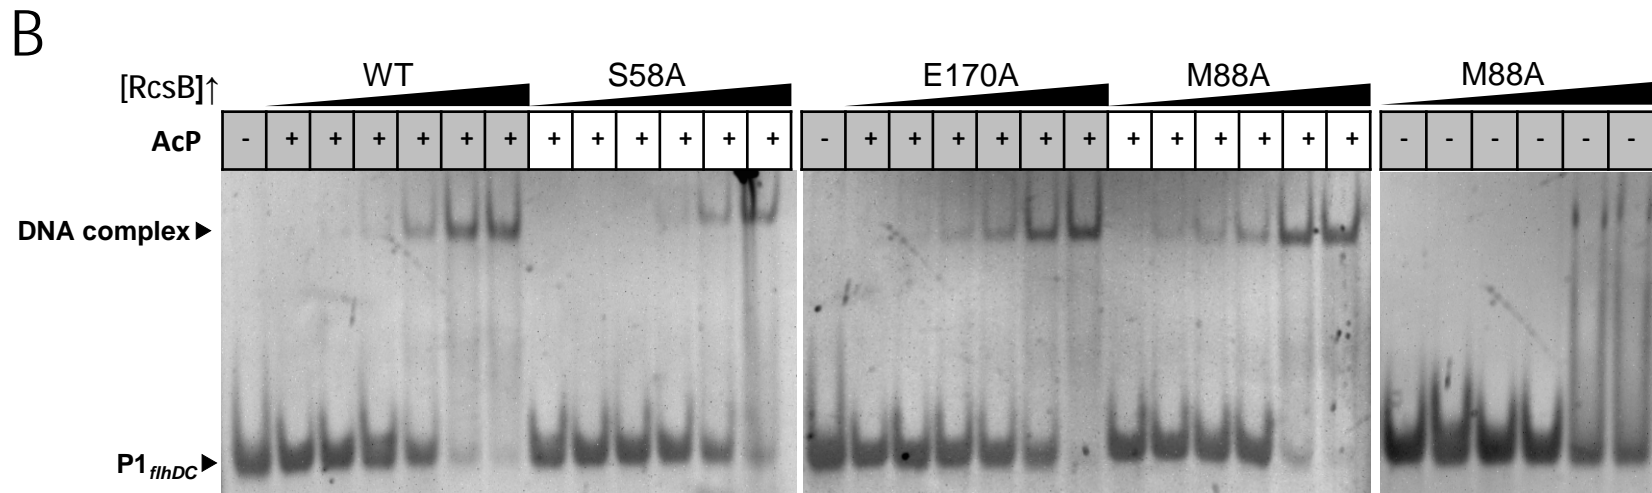

**Figure S12. EMSA experiments with RcsB mutants to test DNA-binding in a concentration dependent manner.** (A) EMSA experiment using 4  $\mu\text{M}$  of wild-type and the purified dimeric specie of S207C in the presence of varying concentrations of P1<sub>flhDC</sub> (0.25, 0.5, 1, 2 and 4  $\mu\text{M}$ ) in the presence and absence of 50 mM AcP. (B) EMSA experiments using 0.5  $\mu\text{M}$  of P1<sub>flhDC</sub> and the catalytic mutants S58A, E170A, M88A of RcsB at 0.25, 0.5, 1, 2, 4 and 6  $\mu\text{M}$  in presence of 50 mM of AcP. EMSA of M88A varying protein concentration in the absence of 50 mM AcP is also shown.

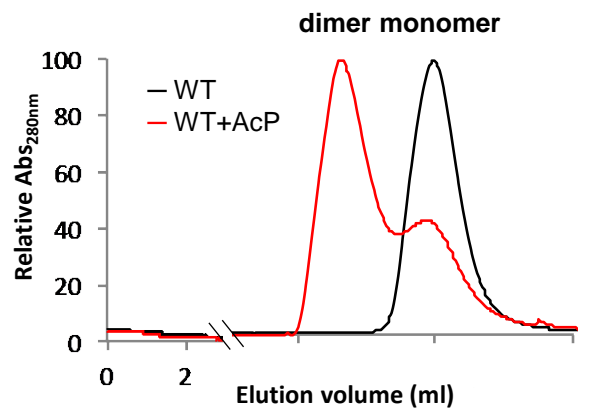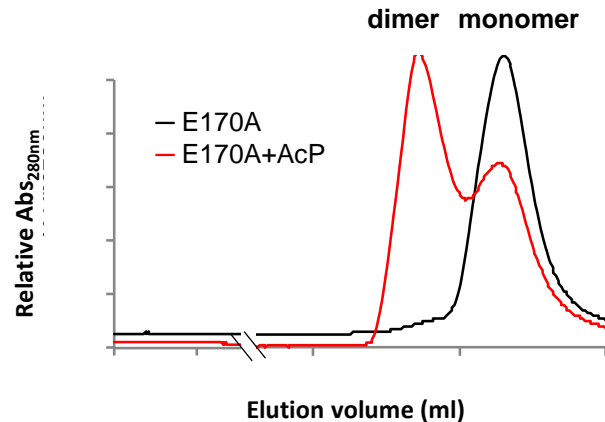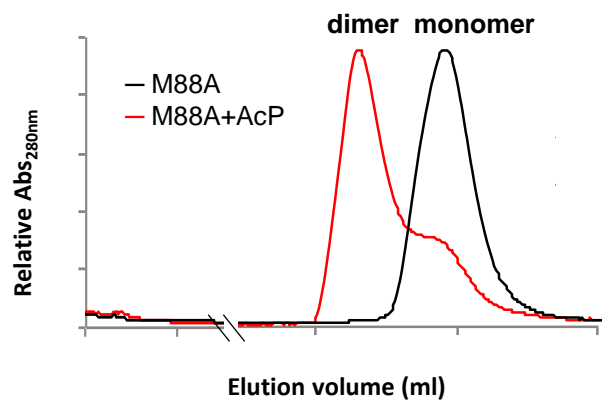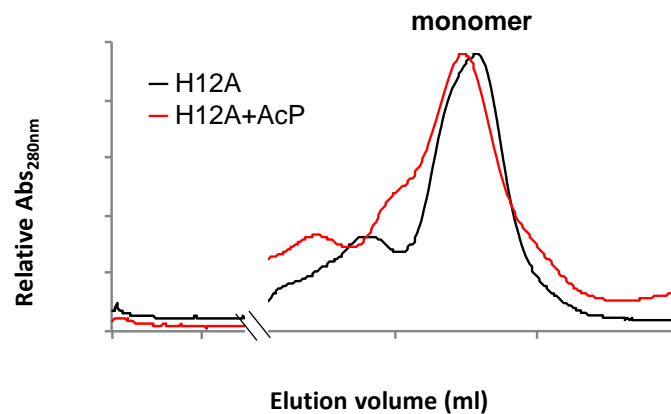

**Figure S13.** Gel filtration analysis to evaluate dimer formation upon phosphorylation. Wild-type RcsB and mutants M88A, E170A, H12A were phosphorylated with 50mM AcP during 30 min at 37°C and subjected to gel filtration with Superdex 200 increase 10/300. All mutants showed dimer formation upon phosphorylation except mutant H12A. The relative proportion of dimer-monomer upon phosphorylation has been calculated and represented in a graph as bars.

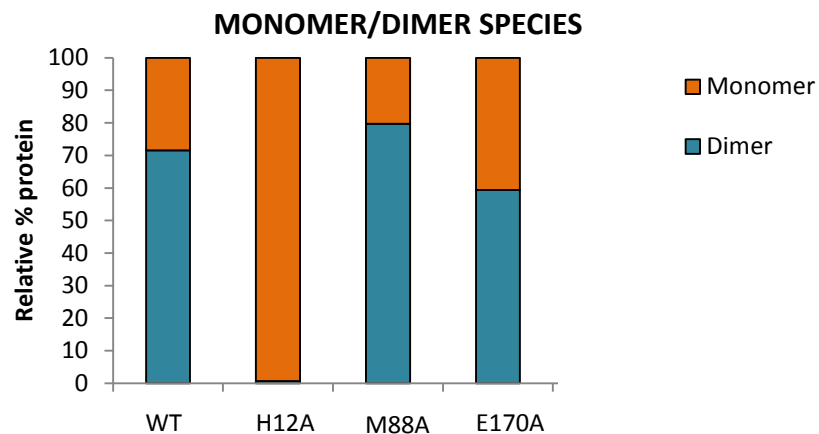

S207C-RcsB<sub>crossed</sub>

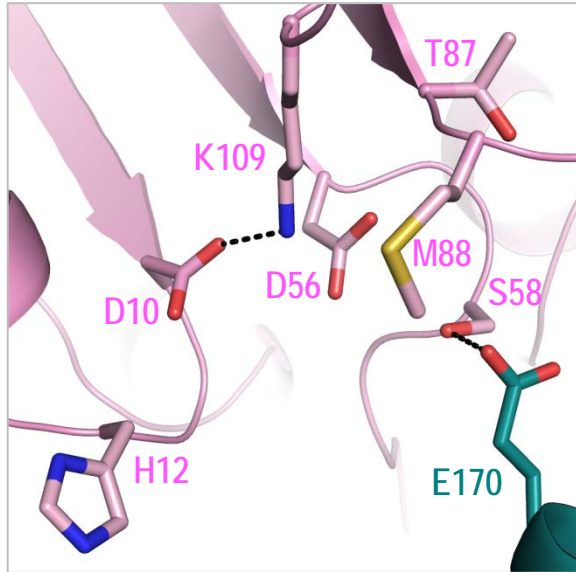

S207C-RcsB<sub>AC</sub>  
Subunit A

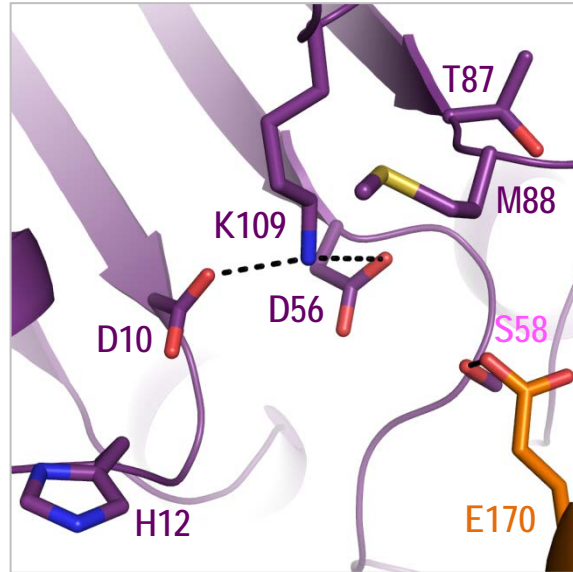

S207C-RcsB<sub>AC</sub>  
Subunit B

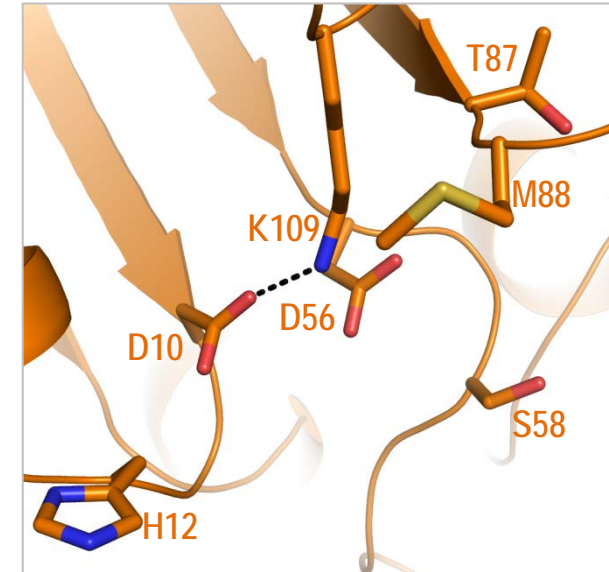

**Figure S14. Active site of S207C-RcsB structures.** Detail of the active site for S207C-RcsB<sub>crossed</sub> (in pink), subunit A in S207C-RcsB<sub>AC</sub> (in violet) and subunit B in S207C-RcsB<sub>AC</sub> (in orange). Catalytic residues are shown as sticks. Residue E170 coming from the DBD domain of the other subunit, in blue for S207C-RcsB<sub>crossed</sub> and in orange for S207C-RcsB<sub>AC</sub> contributes to the active site. As the REC of subunit B in S207C-RcsB<sub>AC</sub> has moved, E170 from the DBD of the other subunit does not longer contributes to the active site. Interactions between residues are shown as dashes lines.

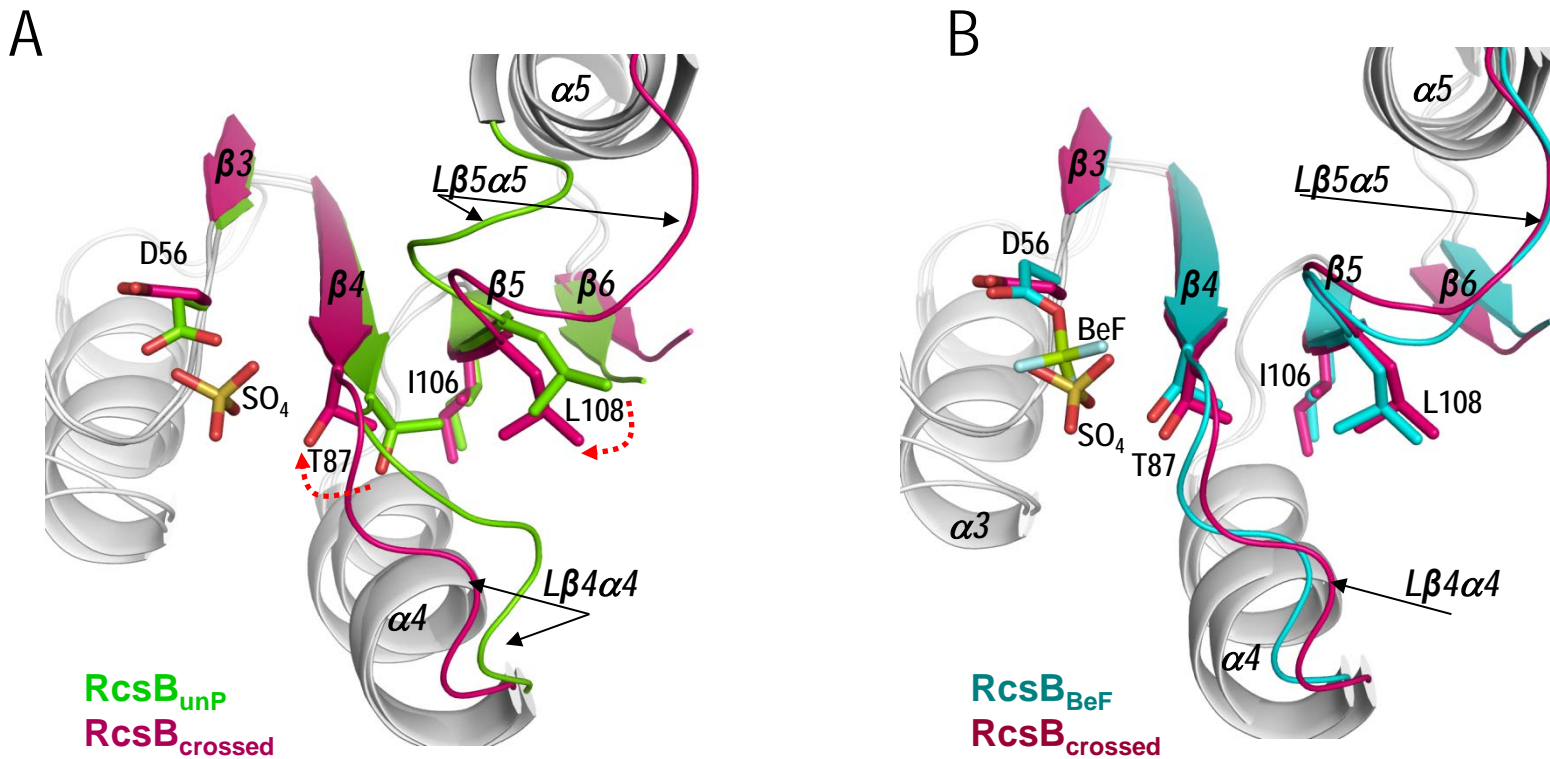

**Figure S15. Switch mechanism ( $\beta 5$ -T coupling) of RcsB.** (A) Superimposition of the RcsB unphosphorylated (RcsB<sub>unP</sub>; green) and phosphorylated conformation (RcsB<sub>crossed</sub> in darkpink) reveals movements, induced by the presence of  $\beta 6$ , in the switch residues T87 and L108 while I106 shows the similar inward conformation. These movements produce conformational changes in L $\beta 4\alpha 4$  and L $\beta 5\alpha 5$ . (B) Superimposition of phosphorylated RcsB<sub>BeF</sub> and RcsB<sub>crossed</sub> shows the switch residues T87 and L108 in a similar orientation, demonstrating the phosphorylated state of RcsB in both structures. L $\beta 4\alpha 4$  and L $\beta 5\alpha 5$  also show a similar conformation, although comparison between RcsB<sub>crossed</sub> subunits reveal movements in the loop L $\beta 5\alpha 5$  which are explained by the lost of interactions at this structural element in the crossed dimer.

A

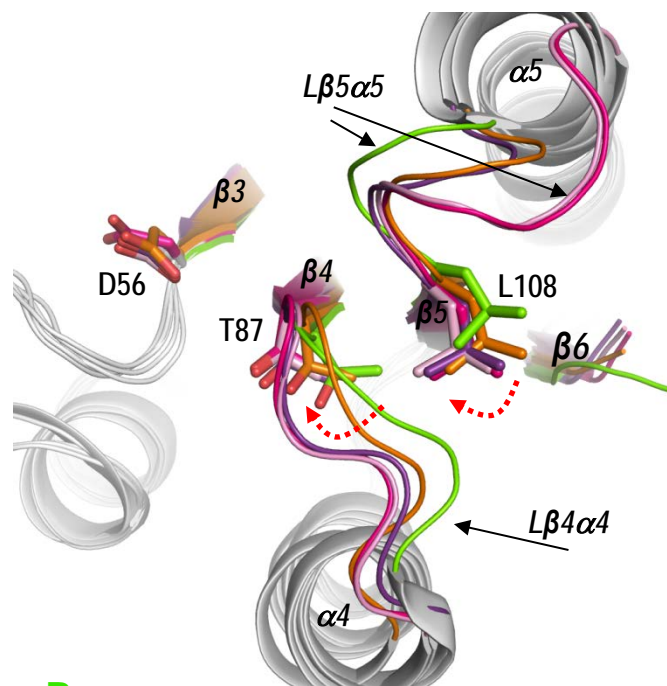

**RcsB<sub>unP</sub>**  
**S207C-RcsB<sub>AC</sub> subunit B**  
**S207C-RcsB<sub>AC</sub> subunit A**  
**S207C<sub>crossed</sub>**  
**RcsB<sub>crossed</sub>**

B

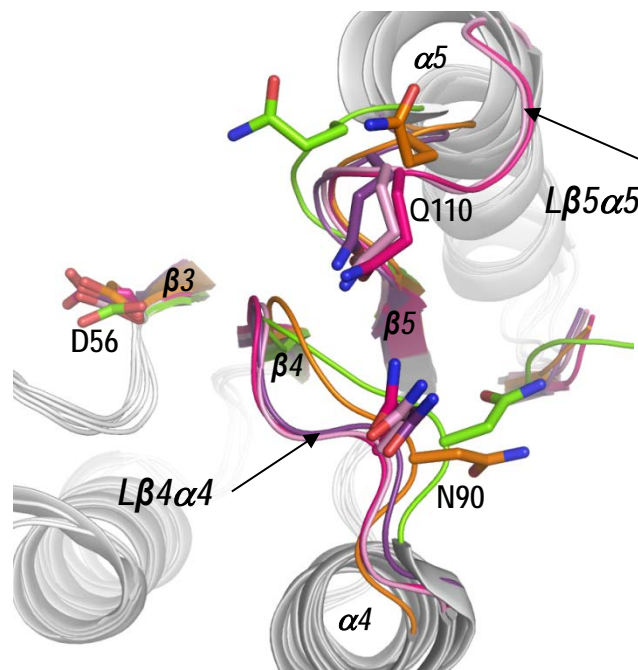

**Figure S16. Switch mechanism ( $\beta 5$ -T coupling) of RcsB wild-type and S207C structures.** Superimposition of the RcsB unphosphorylated (RcsB<sub>unP</sub>; green) and phosphorylated conformations (RcsB<sub>crossed</sub> in darkpink) with mutant S207C structures S207C-RcsB<sub>crossed</sub> (in pink), subunit A in S207C-RcsB<sub>AC</sub> (in violet) and subunit B in S207C-RcsB<sub>AC</sub> (in orange). (A) T87 and L108 orientations in S207C-RcsB<sub>crossed</sub> and subunit A in S207C-RcsB<sub>AC</sub> are similar to RcsB<sub>crossed</sub> acquiring the active form while subunit B in S207C-RcsB<sub>AC</sub> shows an orientation at T87 and L108 halfway inactive/active conformation. (B) Changes in orientation for T87 and L108 cause movements of Asn90 at L $\beta 4\alpha 4$  and Gln110 at L $\beta 5\alpha 5$  in subunit B of S207C-RcsB<sub>AC</sub> similar to the unphosphorylated RcsB<sub>unP</sub> structure in a transition state from the active to inactive conformation.
